# Supplementary material for: Cardiovascular effects and safety of long-term colchicine treatment: Cochrane review and meta-analysis
Source: HighWire-hosted journal article supplement (doi:10.1136/heartjnl-2015-308542), 2016-02-01
Supplement: heartjnl-2015-308542supp3.pdf [file heartjnl-2015-308542supp3.pdf]

**Supplemental File 3: Risk of bias assessment**

| Study                                                    | Random sequence generation | Allocation concealment | Blinding of patients and personnel | Blinding of outcome assessment | Incomplete Outcome Data | Selective Reporting |
|----------------------------------------------------------|----------------------------|------------------------|------------------------------------|--------------------------------|-------------------------|---------------------|
| <b>Studies in patients with high cardiovascular risk</b> |                            |                        |                                    |                                |                         |                     |
| Deftereos 2013[12]                                       | Low                        | Unclear                | Low                                | Low                            | Unclear                 | Unclear             |
| Deftereos 2014[22]                                       | Low                        | Unclear                | Low                                | Low                            | Low                     | Unclear             |
| Nidorf 2013[11]                                          | Low                        | Low                    | High                               | Low                            | Low                     | Unclear             |
| O'Keefe 1992[10]                                         | Unclear                    | Unclear                | Low                                | Unclear                        | Unclear                 | Unclear             |
| <b>Other studies</b>                                     |                            |                        |                                    |                                |                         |                     |
| Adhami 1998[40]                                          | High                       | Low                    | Low                                | Unclear                        | High                    | Unclear             |
| Almasio 2000[41]                                         | Low                        | Low                    | Low                                | Unclear                        | Low                     | Unclear             |
| Antoniou 2006[46]                                        | Low                        | Unclear                | High                               | Unclear                        | High                    | Unclear             |
| Bodenheimer 1988[28]                                     | Unclear                    | Unclear                | Low                                | Unclear                        | High                    | Unclear             |
| Buligescu 1989[31]                                       | Unclear                    | Unclear                | Unclear                            | Unclear                        | Unclear                 | High                |
| Colman 1998[39]                                          | Unclear                    | Unclear                | Low                                | Unclear                        | High                    | High                |
| Copilot[43]                                              | Unclear                    | Unclear                | Unclear                            | Unclear                        | High                    | High                |
| CORE[50]                                                 | Unclear                    | Unclear                | High                               | Low                            | High                    | Unclear             |
| CORP[51]                                                 | Low                        | Low                    | Low                                | Low                            | Low                     | Unclear             |
| CORP-2[49]                                               | Low                        | Low                    | Low                                | Low                            | Low                     | Low                 |
| Cortez-Pinto 2002[42]                                    | Low                        | Low                    | Low                                | Unclear                        | High                    | Unclear             |
| Douglas 1998[38]                                         | Low                        | Unclear                | High                               | Unclear                        | Unclear                 | Unclear             |
| Ikeda 1996[48]                                           | Unclear                    | Unclear                | High                               | Unclear                        | Unclear                 | Unclear             |
| Kaplan 1986[25]                                          | Unclear                    | Unclear                | Low                                | Unclear                        | Low                     | Unclear             |
| Kaplan 1999[44]                                          | Low                        | Low                    | Low                                | Unclear                        | High                    | Unclear             |
| Kershenobich 1976[23]                                    | Unclear                    | Unclear                | Low                                | Unclear                        | Unclear                 | High                |
| Kershenobich 1988[29]                                    | Unclear                    | Low                    | Low                                | Unclear                        | High                    | Unclear             |
| Kyle 1985[24]                                            | Unclear                    | Unclear                | High                               | Unclear                        | Unclear                 | Unclear             |
| Kyle 1997[37]                                            | Unclear                    | Unclear                | Unclear                            | Unclear                        | Unclear                 | Unclear             |
| Lin 1996[35]                                             | Low                        | Unclear                | High                               | Unclear                        | Unclear                 | Unclear             |
| Lukina 1995[52]                                          | Unclear                    | Unclear                | Unclear                            | Unclear                        | High                    | High                |
| Morgan 2005[45]                                          | Low                        | Low                    | Low                                | Low                            | Low                     | Unclear             |
| Muntoni 2010[47]                                         | Unclear                    | Unclear                | Low                                | Unclear                        | High                    | Unclear             |
| Nikolaidis 2006[53]                                      | Unclear                    | Unclear                | Unclear                            | Unclear                        | Unclear                 | Unclear             |
| Olsson 1995[34]                                          | Unclear                    | Unclear                | Low                                | Unclear                        | High                    | Unclear             |
| Parise 1995[69]                                          | Unclear                    | Unclear                | Low                                | Unclear                        | Low                     | Unclear             |
| Paulus 1974[54]                                          | Unclear                    | Unclear                | Low                                | Unclear                        | High                    | Unclear             |
| Poupon 1996[36]                                          | Unclear                    | Unclear                | Low                                | Unclear                        | Unclear                 | Unclear             |
| Raedsch 1992[55]                                         | Unclear                    | Unclear                | Low                                | Unclear                        | Unclear                 | Unclear             |
| Reinhardt 1986[26]                                       | Unclear                    | Unclear                | Low                                | Unclear                        | Unclear                 | Unclear             |
| Trinchet 1989[30]                                        | Unclear                    | Unclear                | Low                                | Unclear                        | High                    | Unclear             |
| Vuoristo 1995[33]                                        | Unclear                    | Unclear                | Low                                | Unclear                        | Unclear                 | Unclear             |
| Wang 1994[32]                                            | Low                        | Low                    | Low                                | Unclear                        | Unclear                 | Unclear             |
| Warnes 1987[27]                                          | Low                        | Unclear                | Low                                | Unclear                        | High                    | Unclear             |
| Yurdakul 2001[21]                                        | Low                        | Low                    | Low                                | Low                            | High                    | Unclear             |
