# Supplementary material for: Cardiovascular effects and safety of long-term colchicine treatment: Cochrane review and meta-analysis
Source: HighWire-hosted journal article supplement (doi:10.1136/heartjnl-2015-308542), 2016-02-01
Supplement: heartjnl-2015-308542supp8.pdf [file heartjnl-2015-308542supp8.pdf]

**Supplemental File 8: Meta-analysis for Colchicine treatment vs. control on myocardial infarction.**

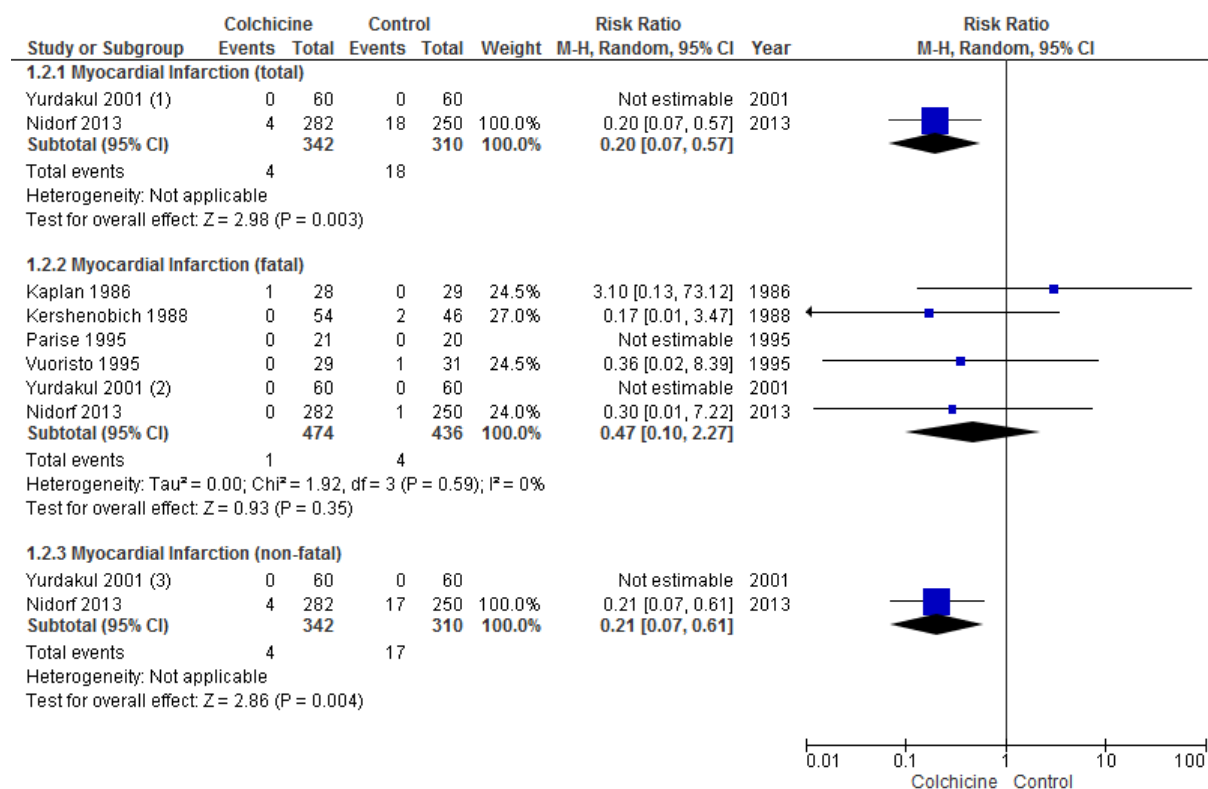

**Footnotes**

- (1) From author request: "We have not seen any cardiovascular events during the trial or later."
- (2) From author request: "We have not seen any cardiovascular events during the trial or later."
- (3) From author request: "We have not seen any cardiovascular events during the trial or later."
