# Supplementary material for: Cardiovascular effects and safety of long-term colchicine treatment: Cochrane review and meta-analysis
Source: HighWire-hosted journal article supplement (doi:10.1136/heartjnl-2015-308542), 2016-02-01
Supplement: heartjnl-2015-308542supp11.pdf [file heartjnl-2015-308542supp11.pdf]

# Supplemental File 11: Meta-analysis for Colchicine treatment vs. control on cardiovascular mortality.

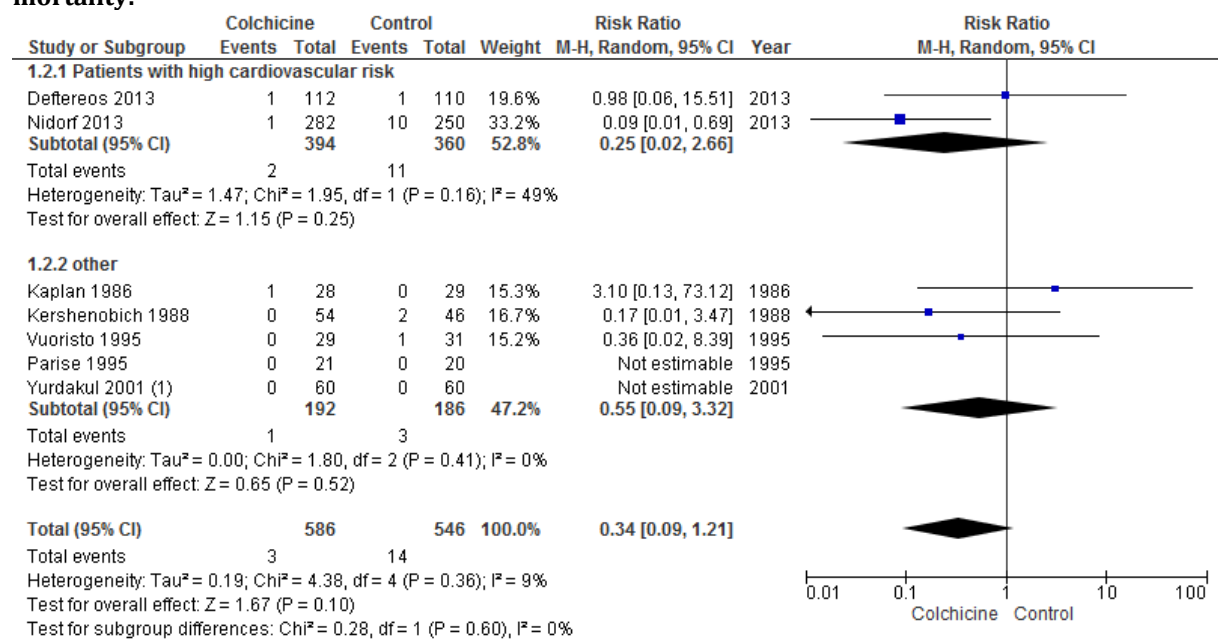

## Footnotes

(1) From author request: "We have not seen any cardiovascular events during the trial or later."
