# Supplementary material for: Cardiovascular effects and safety of long-term colchicine treatment: Cochrane review and meta-analysis
Source: HighWire-hosted journal article supplement (doi:10.1136/heartjnl-2015-308542), 2016-02-01
Supplement: heartjnl-2015-308542supp12.pdf [file heartjnl-2015-308542supp12.pdf]

**Supplemental File 12: Sensitivity analysis on impact of Colchicine dose on all-cause mortality.**

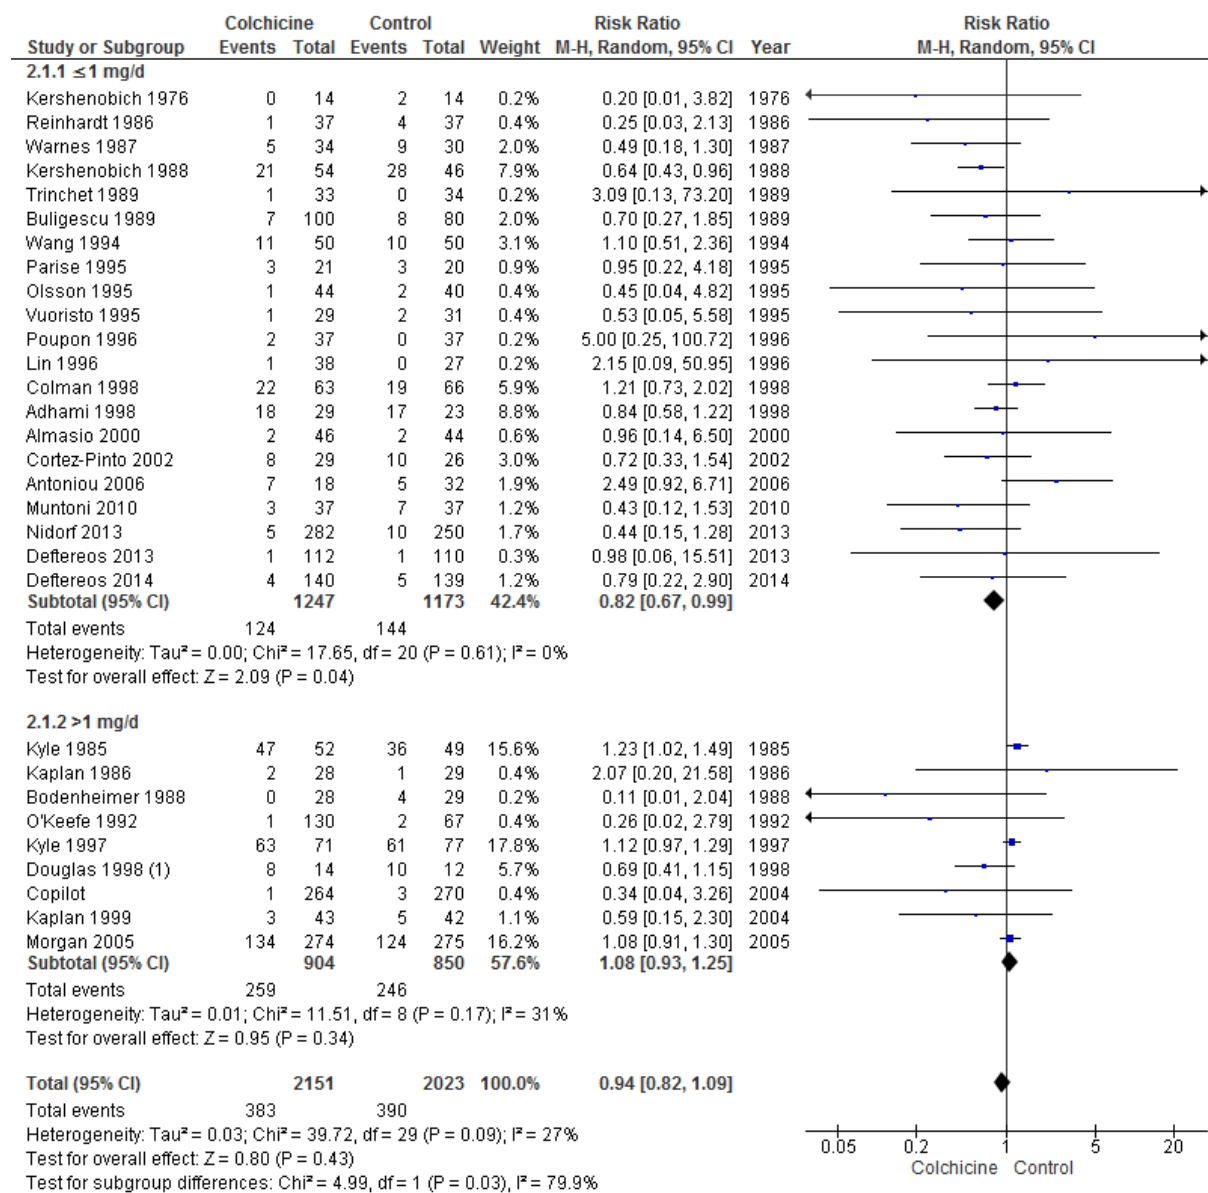

**Footnotes**

(1) Dose 0.6-1.2 - as high as tolerated
