# Supplementary figures and images for: Cardiovascular effects and safety of long-term colchicine treatment: Cochrane review and meta-analysis
Source: HighWire-hosted journal article supplement (doi:10.1136/heartjnl-2015-308542), 2016-02-01

**Supplemental File 7: Meta-analysis for Colchicine treatment vs. control on all-cause mortality.**

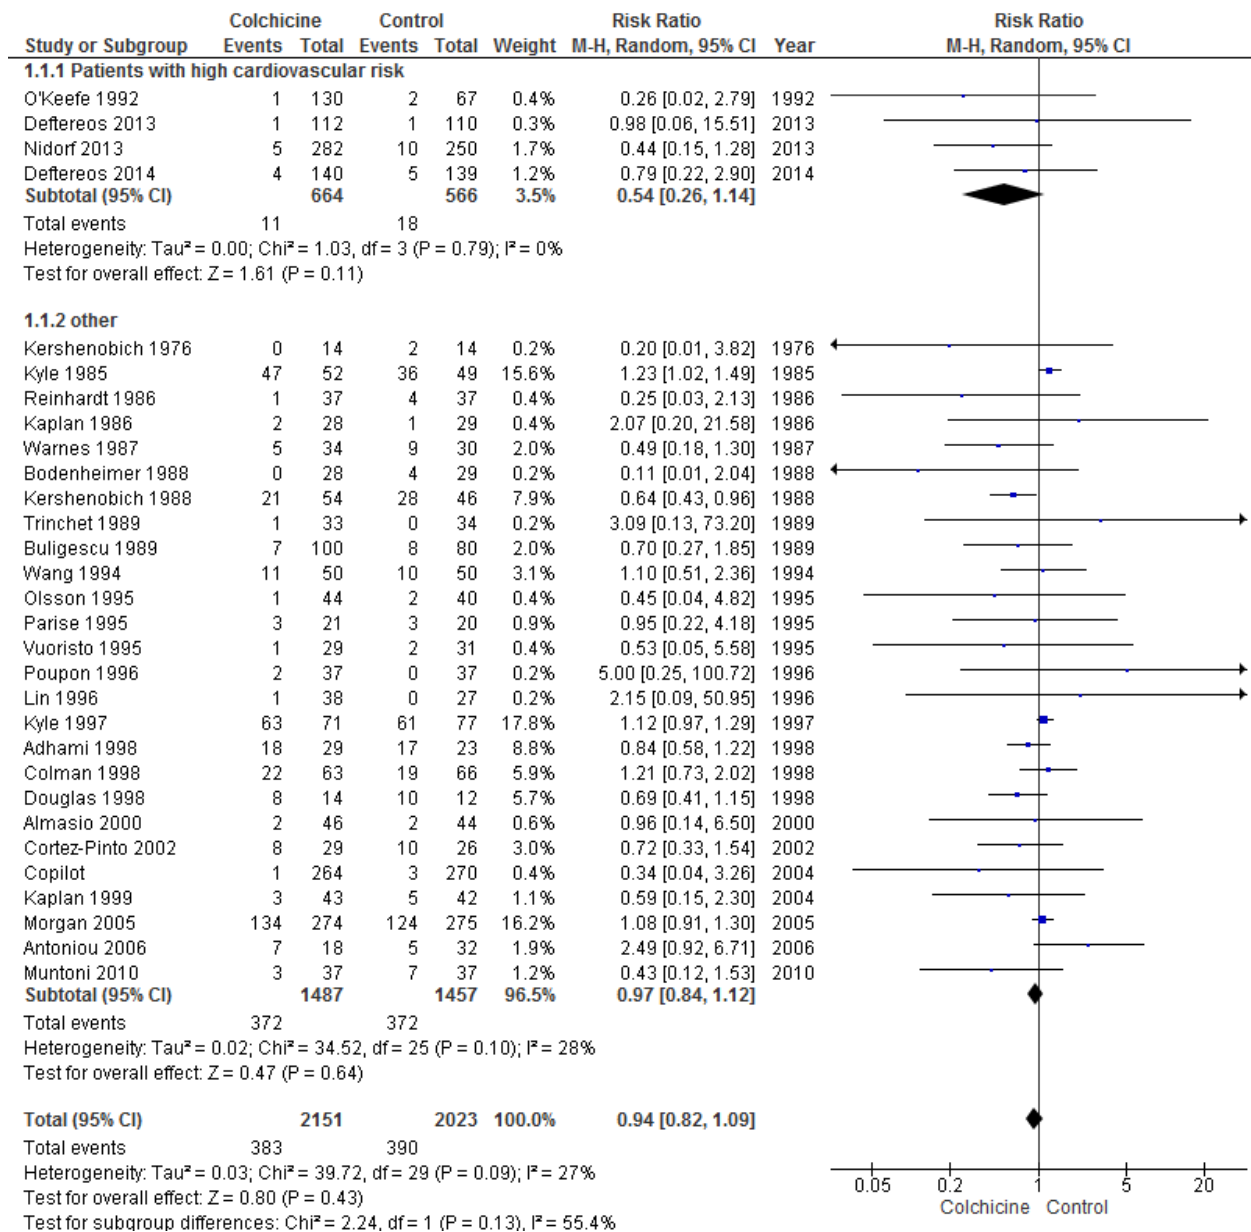

Supplement: heartjnl-2015-308542supp7.pdf [file heartjnl-2015-308542supp7.pdf]

Supplemental File 4: Funnel for all-cause mortality

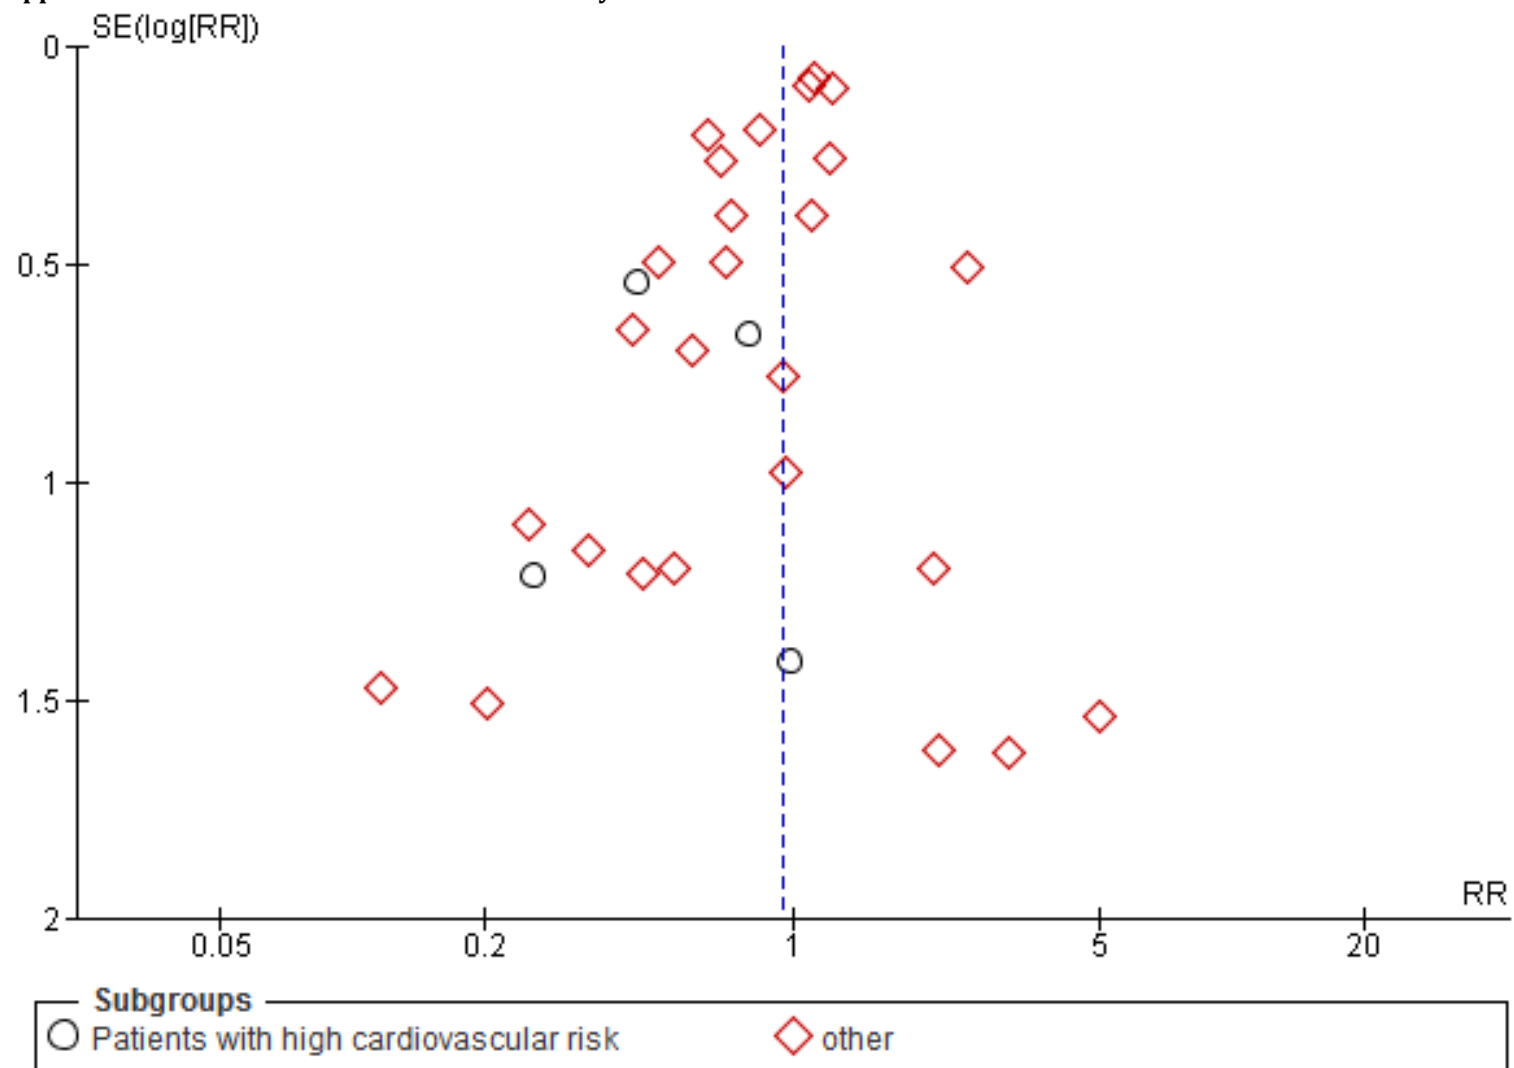

Supplement: heartjnl-2015-308542supp4.pdf [file heartjnl-2015-308542supp4.pdf]

### Supplemental File 5: Funnel for adverse events (gastrointestinal)

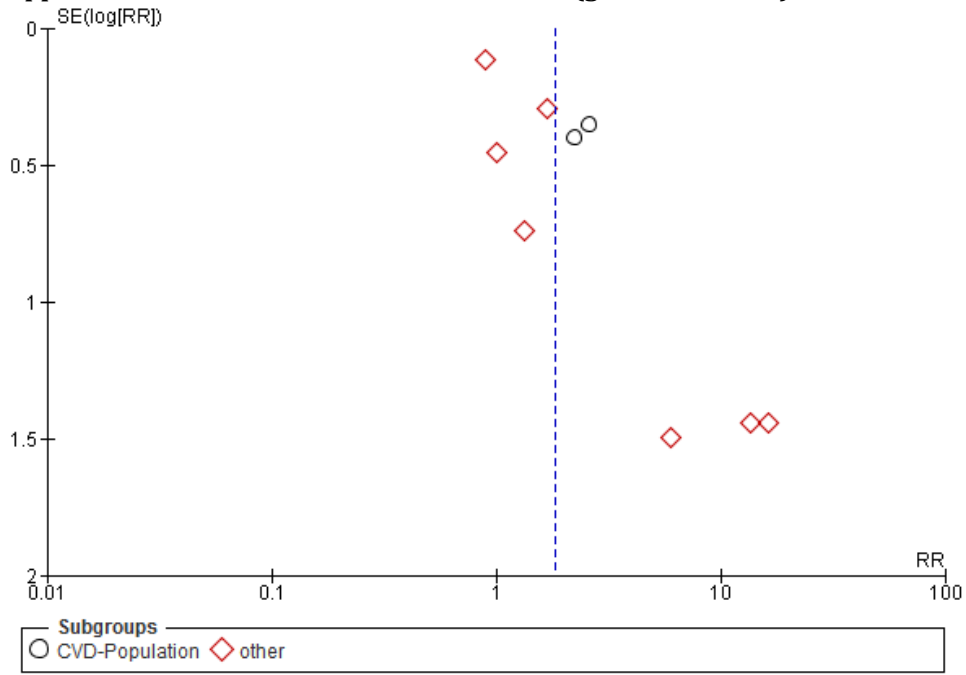

Supplement: heartjnl-2015-308542supp5.pdf [file heartjnl-2015-308542supp5.pdf]

### Supplemental File 9: Meta-analysis for Colchicine treatment vs. control on any adverse events.

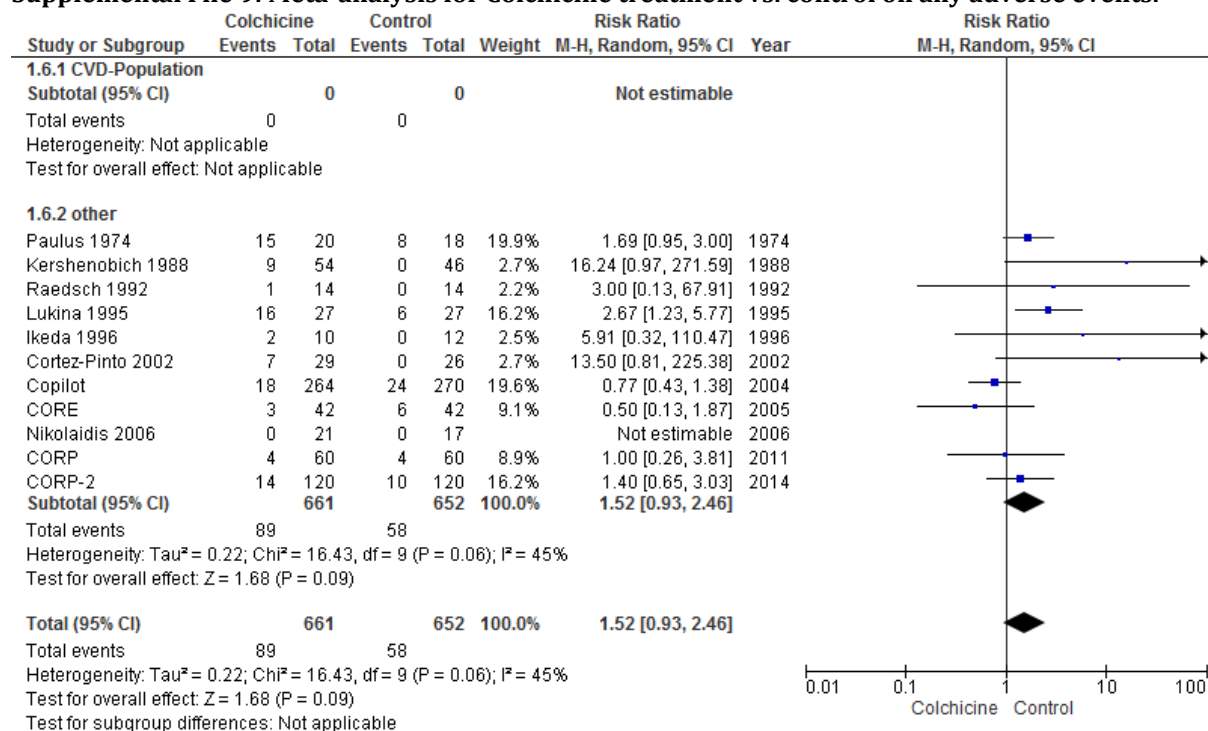

Supplement: heartjnl-2015-308542supp9.pdf [file heartjnl-2015-308542supp9.pdf]

### Supplemental File 6: Funnel for adverse events (total)

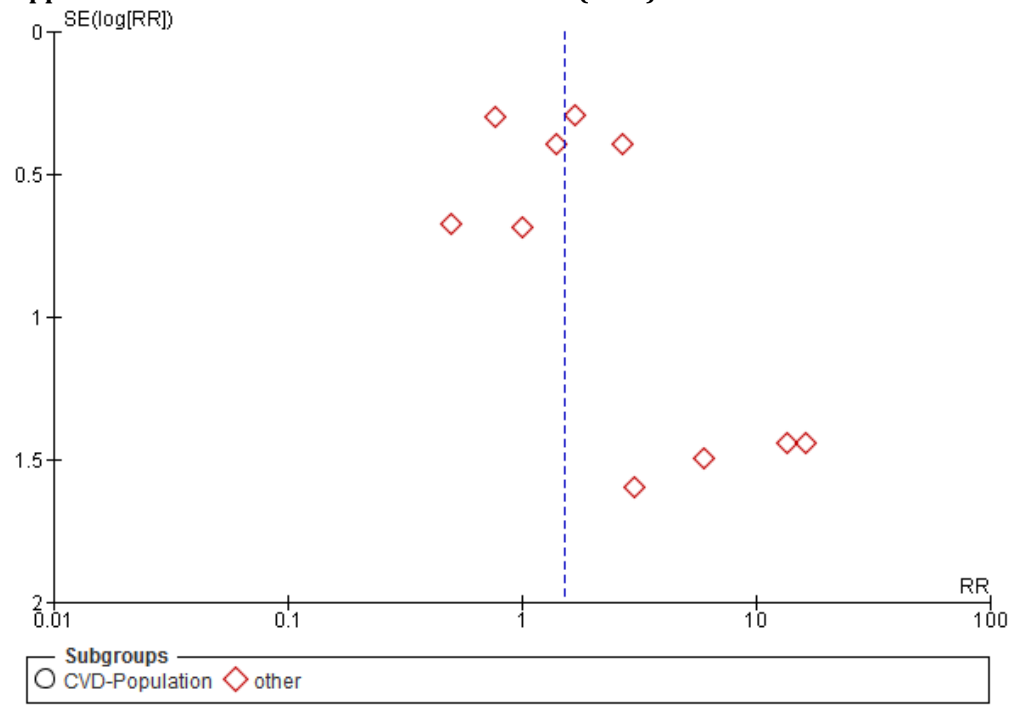

Supplement: heartjnl-2015-308542supp6.pdf [file heartjnl-2015-308542supp6.pdf]
